# Supplementary material
Source: HighWire-hosted journal article supplement (http://ajnr-stage2.highwire.org/highwire/filestream/52260/field_highwire_adjunct_files/0/2244_materials.pdf)
Supplement: 2244_materials.pdf [file 2244_materials.pdf]

**On-line Table: Admission volume of abnormally high absolute BBBP values, age, tPA administration, and development of SHT and ME in our study patients<sup>a</sup>**

| Patient No. | Admission Volume of Abnormally High Absolute BBBP Values (mL) | Treatment        | Age (yr) | SHT or ME |
|-------------|---------------------------------------------------------------|------------------|----------|-----------|
| 1           | 11.7                                                          | IA tPA and Merci | 65       | ME        |
| 2           | 8.2                                                           | IV tPA           | 73       | ME        |
| 3           | 17.0                                                          | IV tPA           | 96       | ME        |
| 4           | 9.6                                                           | IV tPA           | 75       | SHT       |
| 5           | 7.3                                                           | IV tPA           | 85       | SHT       |
| 6           | 7.0                                                           | IA tPA + Merci   | 91       | SHT       |
| 7           | 29.7                                                          | IA tPA + Merci   | 39       | No        |
| 8           | 19.5                                                          | IA tPA + Merci   | 49       | No        |
| 9           | 16.5                                                          | Conservative     | 68       | No        |
| 10          | 16.7                                                          | Conservative     | 69       | No        |
| 11          | 42                                                            | Merci            | 70       | No        |
| 12          | 3                                                             | IA tPA + Merci   | 46       | No        |
| 13          | 1.1                                                           | IV tPA           | 63       | No        |
| 14          | 1.6                                                           | IV tPA           | 64       | No        |
| 15          | 1.4                                                           | IA tPA + Merci   | 65       | No        |
| 16          | 0                                                             | IV tPA           | 68       | No        |
| 17          | 3.9                                                           | IA tPA + Merci   | 71       | No        |
| 18          | 0.3                                                           | IV tPA           | 73       | No        |
| 19          | 0.3                                                           | IV tPA           | 73       | No        |
| 20          | 1.3                                                           | IA tPA + Merci   | 74       | No        |
| 21          | 0                                                             | IV tPA           | 85       | No        |
| 22          | 3.1                                                           | IA tPA + Merci   | 86       | No        |
| 23          | 0.1                                                           | IV tPA           | 86       | No        |
| 24          | 0.5                                                           | IA tPA + Merci   | 87       | No        |
| 25          | 0.1                                                           | IV tPA           | 90       | No        |
| 26          | 0                                                             | IV tPA           | 91       | No        |
| 27          | 1.7                                                           | Merci            | 56       | No        |
| 28          | 5.3                                                           | Conservative     | 61       | No        |
| 29          | 0                                                             | Conservative     | 64       | No        |
| 30          | 3.2                                                           | Conservative     | 69       | No        |
| 31          | 1.0                                                           | Conservative     | 81       | No        |
| 32          | 0.8                                                           | Merci            | 90       | No        |

<sup>a</sup> This table highlights that all patients with SHT or ME—and only patients with SHT or ME—had an admission volume of abnormally high absolute BBBP >7 mL, were at least 65 years of age, and received tPA (either IV or IA). While 0, 1, or 2 of the risk factors for SHT or ME may be present in each patient, only patients with all 3 risk factors developed SHT or ME.

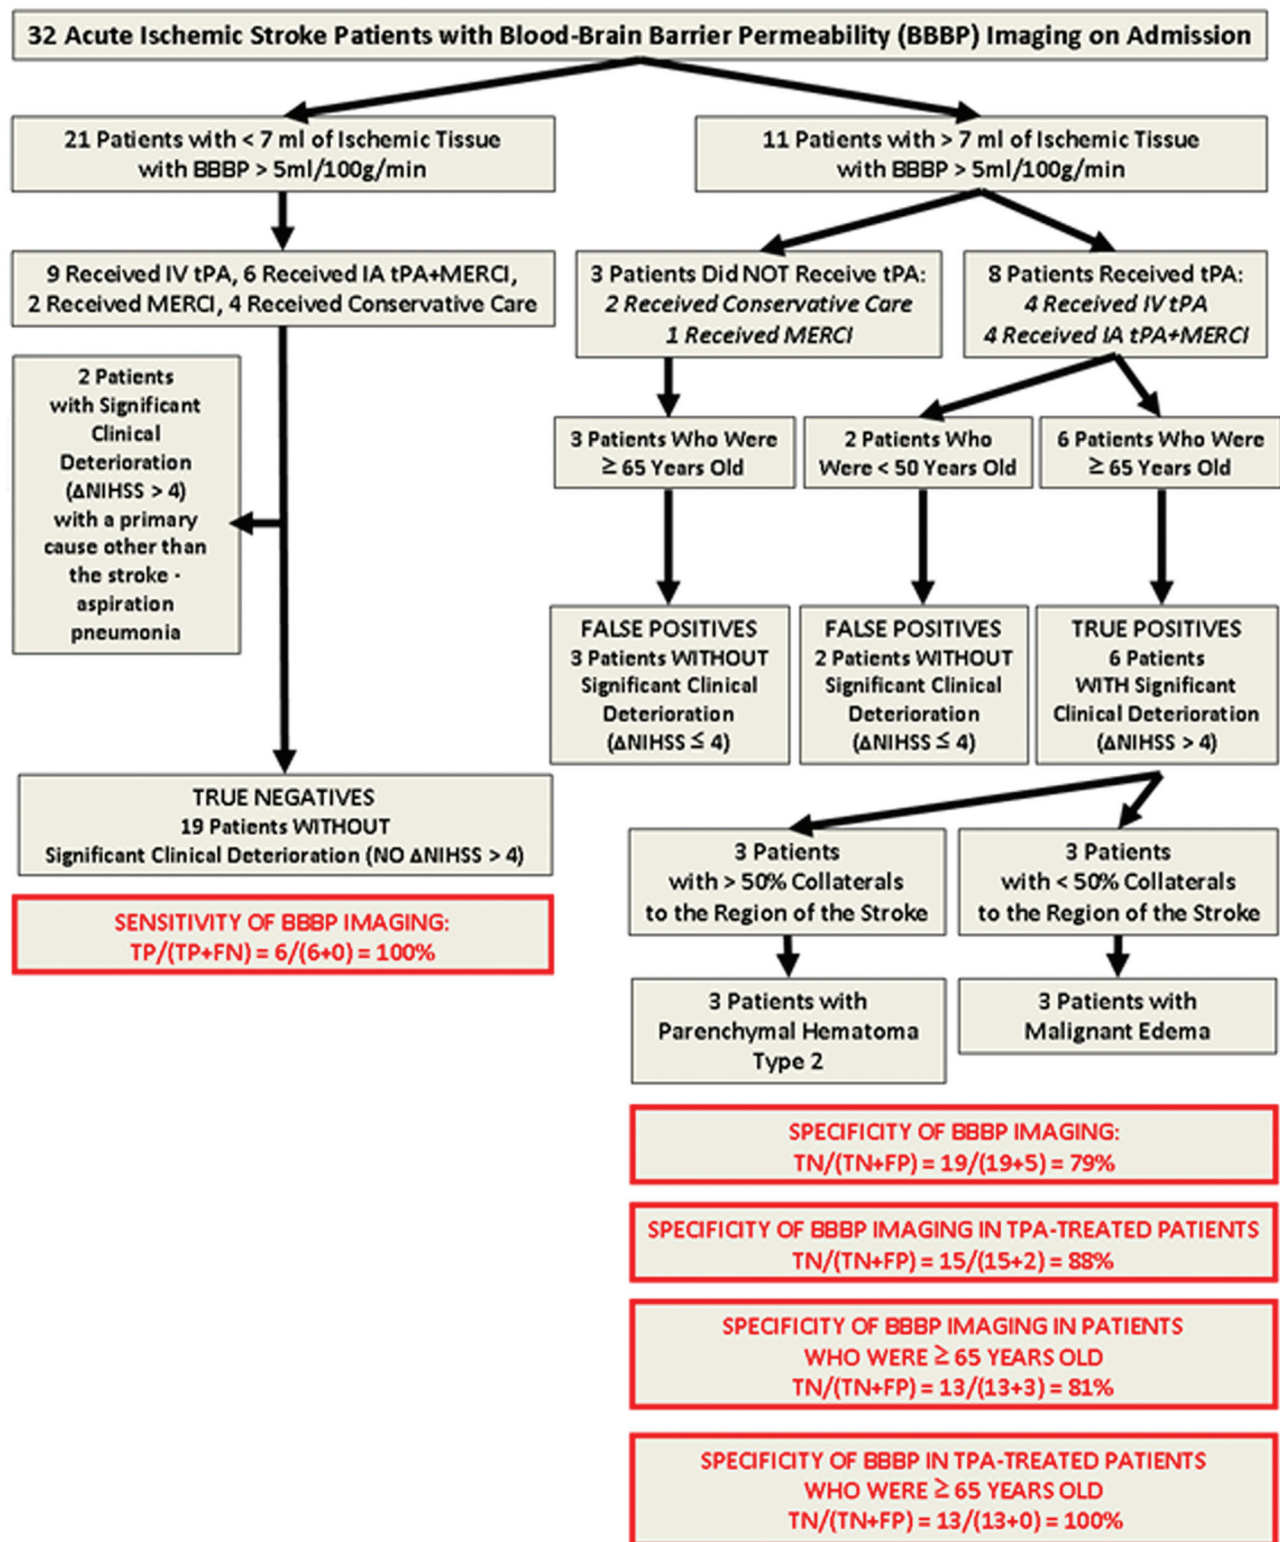

On-line Fig 1. Flowchart of our predictive algorithm for SHT and ME.
